# Supplementary material for: Anti-leishmanial activity of Ni(ii), Pd(ii) and Pt(ii) β-oxodithioester complexes
Source: Royal Society of Chemistry journal article supplement (doi:10.1039/c5nj00765h), 2015-01-01
Supplement: c5nj00765h1.pdf [file c5nj00765h1.pdf]

## Electronic Supporting Information

### Anti-leishmanial activity of Ni(II), Pd(II) and Pt(II) $\beta$ -oxodithioester complexes

Manoj Kumar Yadav<sup>a</sup>, Gunjan Rajput<sup>a</sup>, Khushboo Srivastava<sup>b</sup>, , Rakesh Kumar Singh<sup>b</sup>, Rajnikant Mishra<sup>c</sup>, Michael G. B. Drew<sup>d</sup> and Nanhai Singh<sup>a\*</sup>

<sup>a</sup>Department of Chemistry, Faculty of Science, Banaras Hindu University,  
Varanasi 221005, India. Fax: +91-542-2386127

E-mail: [nsingh@bhu.ac.in](mailto:nsingh@bhu.ac.in), [nsinghbhu@gmail.com](mailto:nsinghbhu@gmail.com)

<sup>b</sup>Department of Biochemistry, Faculty of Science, Banaras Hindu University, Varanasi-221005, India.

<sup>c</sup>Department of Zoology, Faculty of Science, Banaras Hindu University, Varanasi- 221005, India.

<sup>d</sup>Department of Chemistry, University of Reading, Whiteknights, Reading, RG6 6AD (U.K.)

### Contents

**SI-** Ligand synthesis.

**SII-** Weak interactions table.

**SI-** Ligand synthesis

**[HL1]**

Yield: (0.252 g, 87%). Anal. Calcd for: C<sub>10</sub>H<sub>9</sub>BrOS<sub>2</sub> (289.21): C 41.53, H 3.14, S 22.13 %. Found: C 41.38, H 3.22, S 21.68 %. IR (KBr, cm<sup>-1</sup>):  $\nu$  = 1580 ( $\nu_{C=C}$ ), 1243 ( $\nu_{C=S}$ ), 1181 ( $\nu_{C-OH}$ ). <sup>1</sup>H NMR (300.70 MHz, CDCl<sub>3</sub>):  $\delta$  14.99 (s, 1H, -C(OH)-), 7.83 (m, 2H, Ar-H), 7.60 (m, 2H, Ar-H), 6.87 (s, 1H, -CH=C-), 2.71 (s, 3H, -SCH<sub>3</sub>) ppm. <sup>13</sup>C{<sup>1</sup>H} NMR (75.45 MHz, CDCl<sub>3</sub>):  $\delta$  217.62 (-C=S), 167.14 (-C(OH)-), 136.41, 134.58, 129.63, 122.95 (Ar-C), 107.89 (-CH=C-), 19.05 (-SCH<sub>3</sub>) ppm.

**[(HL2)]**

Yield: (1.94 g, 85%), Anal. Calcd for C<sub>10</sub>H<sub>9</sub>F<sub>1</sub>O<sub>1</sub>S<sub>2</sub> (228.31): C 52.61, H 3.97, S 28.03 %. Found: C 52.29, H 4.07, S 27.61 %. IR (KBr, cm<sup>-1</sup>):  $\nu$  = 1587 ( $\nu_{C=C}$ ), 1243.36 ( $\nu_{C=S}$ ), 1057 ( $\nu_{C-OH}$ ). <sup>1</sup>H NMR (300.70 MHz, CDCl<sub>3</sub>):  $\delta$  14.89 (s, 1H, -C(OH)-), 7.86-7.83 (m, 2H, Ar-H), 6.95-6.97 (m, 2H, Ar-H), 6.72 (s, 1H, -CH=C(S)-), 2.66 (s, 3H, -SCH<sub>3</sub>) ppm. <sup>13</sup>C{<sup>1</sup>H} NMR (75.45 MHz, CDCl<sub>3</sub>):  $\delta$  215.02 (-C=S), 167.10 (-C(OH)-), 126.21, 128.68, 137.49, 162.81 (Ar-C), 107.87 (-CH=C(S)-), 18.20 (-SCH<sub>3</sub>) ppm.

**[(HL3)]**

Yield: (1.93g, 74%), Anal. Calcd for; C<sub>14</sub>H<sub>12</sub>OS<sub>2</sub> (260.38): C 64.58, H 4.65, S 24.58 %. Found: C 64.13, H 4.81, S 24.15 %. IR (KBr, cm<sup>-1</sup>):  $\nu$  = 1593 ( $\nu_{C=C}$ ), 1242.89 ( $\nu_{C=S}$ ), 1107 ( $\nu_{C-OH}$ ). <sup>1</sup>H NMR (300.40 MHz, CDCl<sub>3</sub>):  $\delta$  15.17 (s, 1H, -C(OH)-), 8.46 (m, 1H, Ar-H), 7.94-7.91 (m, 1H, Ar-H), 7.87-7.84 (m, 2H, Ar-H), 7.58-7.50 (m, 2H, Ar-H), 7.24-7.21 (m, 1H, Ar-H), 7.10 (s, 1H, -CH=C-), 2.68-2.64 (s, 3H, SCH<sub>3</sub>) ppm. <sup>13</sup>C{<sup>1</sup>H} NMR (75.45, CDCl<sub>3</sub>):  $\delta$  218.0 (-C=S-), 169.1 (-C(OH)-), 134.95-122.72 (Ar-C), 108.22 (-CH=C(S)-), 19.7 (-SCH<sub>3</sub>) ppm.

**[HL4]**

Yield: (0.197 g, 82%). Anal. Calcd for: C<sub>11</sub>H<sub>12</sub>O<sub>2</sub>S<sub>2</sub> (240.34): C 54.97, H 5.03, S 26.63 %. Found: C 54.74, H 5.09, S 26.37 %. IR (KBr, cm<sup>-1</sup>):  $\nu$  = 1603 ( $\nu_{C=C}$ ), 1231 ( $\nu_{C=S}$ ), 1179 ( $\nu_{C-OH}$ ). <sup>1</sup>H NMR (300.40 MHz, CDCl<sub>3</sub>):  $\delta$  15.09 (s, 1H, -C(OH)-), 7.86 (m, 2H, Ar-H), 6.95 (m, 2H, Ar-H), 6.97 (s, 1H, -CH=C-), 3.86 (s, 3H, -OCH<sub>3</sub>), 2.64 (s, 3H, -SCH<sub>3</sub>) ppm. <sup>13</sup>C{<sup>1</sup>H} NMR (74.45 MHz, CDCl<sub>3</sub>):  $\delta$  215.62 (-C=S), 169.51 (-C(OH)-), 162.81, 128.68, 126.21, 114.40 (Ar-C), 107.08 (-CH=C(S)-), 55.51 (-OCH<sub>3</sub>), 17.96 (-SCH<sub>3</sub>) ppm.

**SII- Weak Interactions table-**

Table-3 Weak Interactions, distances, Å, angles deg. A = acceptor, D = donor

|   | Contact D-H...A        | H...A | D...A | D...A | Symmetry element for A |
|---|------------------------|-------|-------|-------|------------------------|
| 2 | C16-H16B...S31         | 2.97  | 150   | 3.826 | -x,-1-y,1z             |
|   | C16-H16A...S11         | 2.98  | 146   | 3.811 | x,-1+y,z               |
|   | C23-H23...F47          | 2.52  | 169   | 3.436 | -x,3-y,-z              |
| 3 | C28-H28... $\pi^{a,b}$ | 2.87  | 131   | 3.546 | x, 1.5-y, 1/2+z        |

|    |                         |      |     |       |                     |
|----|-------------------------|------|-----|-------|---------------------|
|    | C45-H45... $\pi^{a,c}$  | 2.88 | 128 | 3.524 | x, 1/2-y, -1/2+z    |
|    | C36-H36A...S11          | 2.89 | 151 | 3.753 | 1-x,2-y,-z          |
|    | C36-H36B...S33          | 2.92 | 141 | 3.723 | 1-x, 1-y, -z        |
| 4  | C28-H28...S11           | 2.99 | 157 | 3.888 | x,y,1+z             |
|    | C16-H16...S11           | 3.01 | 168 | 3.955 | -x,1/2+y,-z         |
| 8  | C28...H28A...S13        | 2.89 | 151 | 3.766 | 1/2-x, 3/2-y, 1/2-z |
|    | C16...H16C...O27        | 2.57 | 132 | 3.290 | 1/2-x, y, 1/2-z     |
| 11 | C16-H16C... $\pi^{a,b}$ | 2.72 | 146 | 3.559 | -1+x,y,z            |
|    | C48-H48... $\pi^{a,d}$  | 2.50 | 147 | 3.318 | 2-x,-1/2+y,1/2-z    |

<sup>a</sup> dimensions involve the centre of gravity of the ring, <sup>b</sup>ring C44-C49, <sup>c</sup>ring C24-C29, <sup>d</sup>ring C21, C22, C23, C28, C29, C30
